# Supplementary material
Source: PubMed Central journal article supplement (PMC5404599)
Supplement: AAC.02515-16_zac005176102s1.pdf [file AAC.02515-16_zac005176102s1.pdf]

Supplementary Table 1. Sources of samples tested for fatty acid auxotrophy

|                                                             |     |
|-------------------------------------------------------------|-----|
| Ascite                                                      | 2   |
| Bronchial (aspiration*, alveolar lavage* or bronchial wash) | 40  |
| Biopsy                                                      | 7   |
| Bone biopsy                                                 | 14  |
| Catheter                                                    | 1   |
| Skin (burn*, wound or infection)                            | 16  |
| Drain                                                       | 5   |
| Endotracheal aspiration                                     | 2   |
| Sputum*                                                     | 14  |
| Hemoculture                                                 | 2   |
| Pleural effusion                                            | 2   |
| Superficial pus                                             | 21  |
| Deep pus                                                    | 3   |
| Nose                                                        | 2   |
| Feces                                                       | 2   |
| TOTAL                                                       | 133 |

Supplementary Table 2. Triclosan resistance revealed by exogenous fatty acids  
in *S. aureus* clinical and veterinary isolates

| 81 % triclosan-sensitive |     | 12 % triclosan-resistant |    | 7 % FA-T <sup>R</sup> |    |
|--------------------------|-----|--------------------------|----|-----------------------|----|
| Superficial wound        | 141 | Superficial wound        | 17 | Superficial wound     | 16 |
| Biopsy                   | 50  | Drain                    | 4  | Biopsy                | 4  |
| Carrier                  | 38  | Carrier                  | 3  | Sputum                | 4  |
| Bronchial wash           | 36  | Urine                    | 3  | Deep wound            | 3  |
| Sputum                   | 35  | Biopsy                   | 2  | Blood culture         | 2  |
| Hemoculture              | 32  | Sputum                   | 1  | Carrier               | 2  |
| Mastitis <sup>a</sup>    | 27  | Blood culture            | 1  | Catheter              | 1  |
| Urine                    | 17  | Bone biopsy              | 1  | Mastitis <sup>a</sup> | 7  |
| Deep wound               | 11  | Mastitis <sup>a</sup>    | 29 | unknown               | 10 |
| Drain                    | 6   | unknown                  | 24 | TOTAL                 | 49 |
| ORL                      | 7   | TOTAL                    | 85 |                       |    |
| n.d                      | 2   |                          |    |                       |    |
| Catheter                 | 1   |                          |    |                       |    |
| Unknown                  | 158 |                          |    |                       |    |
| TOTAL                    | 561 |                          |    |                       |    |

a : Isolates from bovine mastitis cases

n.d: not determined

Supplementary Table 3. Source, Spa typing and MLST of Endo and Exo isolates

| FA profile | Isolate            | Source   | Spa type       | MLST Clonal complex |
|------------|--------------------|----------|----------------|---------------------|
| Endo       | Harm 34-50         | Unknown  | TMDMGMK        | CC5                 |
|            | P <sup>3</sup> 23  | Biopsy   | YHGFMBQBLO     | CC8                 |
|            | P <sup>3</sup> 138 | Biopsy   | YHGFMBQBLO     | CC8                 |
|            | P <sup>2</sup> 71  | Carrier  | YHGFMBQBLO     | CC8                 |
|            | Harm 47-50         | Unknown  | WGKAOMQ        | CC8                 |
|            | Harm 19-50         | Unknown  | WGKAOMQ        | CC8                 |
|            | P <sup>2</sup> 81  | Deep     | YHGFMBQBLO     | CC8                 |
|            | P <sup>2</sup> 69  | Superfic | YHGFMBQBLO     | CC8                 |
|            | P <sup>2</sup> 89  | Superfic | YHGFMBQBLO     | CC8                 |
|            | P <sup>3</sup> 146 | Superfic | YHGFMBQBLO     | CC8                 |
|            | P <sup>3</sup> 151 | Superfic | YHGFMBQBLO     | CC8                 |
|            | P <sup>3</sup> 12  | Superfic | XMM            | CC45                |
|            | Trsa276            | Sputum   | XKBQBBMM       | CC45                |
|            | P <sup>3</sup> 1   | Biopsy   | XKAOAOBO       | CC398               |
|            | P <sup>3</sup> 101 | Biopsy   | XKAOAOBO       | CC398               |
|            | P <sup>3</sup> 73  | Deep     | XKANOAOBO      | CC398               |
|            | P <sup>3</sup> 139 | Superfic | XKAOAOBO       | CC398               |
|            | P <sup>2</sup> 74  | Superfic | UJGBBGGJ       | CC15                |
|            | P <sup>3</sup> 49  | Superfic | UJGBBGGJ       | CC20                |
|            | P <sup>3</sup> 109 | Catheter | UJGBBGGJAGJ    | CC20                |
| Exo        | Trsa 275           | Sputum   | TJMBMAMGMK     | CC5                 |
|            | P <sup>1</sup> 2   | Superfic | XKAKBEBKB      | CC45                |
|            | P <sup>1</sup> 113 | Superfic | UPE            | ND                  |
|            | P <sup>1</sup> 127 | Superfic | UPE            | ND                  |
|            | P <sup>1</sup> 46  | Superfic | ZFGMGGM        | CC25                |
|            | P <sup>1</sup> 76  | Superfic | UJGBBGGJAGJ    | CC20                |
|            | Trsa 36            | Sputum   | UJFMBGJAGJ     | CC20                |
|            | MT8099             | Mastitis | UG2MFBBLB      | CC20                |
|            | MT8348             | Mastitis | UG2MFBBLB      | CC20                |
|            | MT8333 8333        | Mastitis | UJGBBGGJAGJAGJ | CC20                |
|            | MT8343             | Mastitis | UKEBPB         | CC97                |
|            | MT8059             | Mastitis | UJGFMBPB       | CC97                |
|            | Trsa 277           | Sputum   | YHGFMBQBLO     | CC8                 |

Selected strains were analyzed by spa typing and Multilocus sequence typing (MLST). Repeats region of protein A gene (*spa*) is routinely used for reliable and discriminatory typing of *S. aureus*. Repeats are assigned a numerical code and spa-type is deduced from the order of specific repeats; the repeat nomenclature was that of Shopsis and colleagues (1) and spa types were retrieved from the Ridom SpaServer (<http://spaserver.ridom.de>). PCR primers and conditions used for the spa tandem repeat amplification were as described (2). PCR products were purified using the QIAquick PCR purification kit (Qiagen, Courtaboeuf,

France) and sequenced (Eurofins MWG Operon, Ebersberg, Germany). The primers and PCR conditions for MLST were as described at <http://saureus.mlst.net/> (3). PCR products were purified as above and sequenced (Beckman-Coulter Genomics), and sequence types (STs) were identified using the MLST database (<http://www.mlst.net>).

1. **Shopsin B, Gomez M, Montgomery SO, Smith DH, Waddington M, Dodge DE, Bost DA, Riehman M, Naidich S, Kreiswirth BN.** 1999. Evaluation of protein A gene polymorphic region DNA sequencing for typing of *Staphylococcus aureus* strains. *J Clin Microbiol* **37**:3556-3563.
2. **Harmsen D, Claus H, Witte W, Rothganger J, Claus H, Turnwald D, Vogel U.** 2003. Typing of methicillin-resistant *Staphylococcus aureus* in a university hospital setting by using novel software for spa repeat determination and database management. *J Clin Microbiol* **41**:5442-5448.
3. **Enright MC, Day NP, Davies CE, Peacock SJ, Spratt BG.** 2000. Multilocus sequence typing for characterization of methicillin-resistant and methicillin-susceptible clones of *Staphylococcus aureus*. *J Clin Microbiol* **38**:1008-1015.

Supplementary Table 4. FabI changes in FA-T<sup>R</sup> isolates with a functioning FASII

| Isolate                         | FabI                       | Additional FabI<br>(sh-FabI <sup>a[1]</sup> ) |
|---------------------------------|----------------------------|-----------------------------------------------|
| P <sup>2</sup> 81               | Phe204Cys <sup>[1-3]</sup> | +                                             |
| P <sup>3</sup> 12               | Ala198Gly <sup>[1,4]</sup> | +                                             |
| Harm 3450                       | Ala198Gly <sup>[1,4]</sup> | ND                                            |
| Trsa 277 <sup>b</sup>           | Ala198Gly <sup>[1,4]</sup> | -                                             |
| NL 36 <sup>c</sup>              | Ala198Gly <sup>[1,4]</sup> | ND                                            |
| MT 8333 <sup>c</sup>            | Ala95Val <sup>[1,5]</sup>  | -                                             |
| Harm 4750                       | Ala95Val <sup>[1,5]</sup>  | ND                                            |
| P <sup>1</sup> 171 <sup>c</sup> | His61Tyr <sup>d</sup>      | +                                             |
| P <sup>1</sup> 179 <sup>c</sup> | His61Tyr <sup>d</sup>      | +                                             |
| P <sup>1</sup> 190 <sup>c</sup> | His61Tyr <sup>d</sup>      | +                                             |
| P <sup>1</sup> 130 <sup>c</sup> | His61Tyr <sup>d</sup>      | +                                             |
| P <sup>3</sup> 1                | His61Tyr <sup>d</sup>      | +                                             |
| P <sup>3</sup> 73               | His61Tyr <sup>d</sup>      | +                                             |
| P <sup>3</sup> 101              | His61Tyr <sup>d</sup>      | +                                             |
| P <sup>3</sup> 139 <sup>b</sup> | His61Tyr <sup>d</sup>      | +                                             |
| P <sup>2</sup> 69               | WT                         | +                                             |
| P <sup>2</sup> 71               | WT                         | +                                             |
| P <sup>2</sup> 74               | WT                         | +                                             |
| P <sup>2</sup> 89               | WT                         | +                                             |
| P <sup>3</sup> 23               | WT                         | +                                             |
| P <sup>3</sup> 49               | WT                         | +                                             |
| P <sup>3</sup> 109              | WT                         | +                                             |
| P <sup>3</sup> 138              | WT                         | +                                             |
| P <sup>3</sup> 146              | WT                         | +                                             |
| P <sup>3</sup> 151              | WT                         | +                                             |
| Harm 1950                       | WT                         | +                                             |
| MT 8059                         | WT                         | +                                             |
| Trsa 276                        | WT                         | +                                             |
| Harm 2950                       | WT                         | +                                             |
| P <sup>1</sup> 19               | WT                         | ND                                            |
| P <sup>1</sup> 39               | WT                         | ND                                            |

a: sh-FabI likely transferred from *Staphylococcus haemolyticus* [1]. b: profile evolved from an Exo-FA profile c: profile evolved from an Intermediate profile,. d: variant likely

unrelated to triclosan resistance as it is present in hundreds of published *S. aureus* genome sequences and the amino acid position is not structurally conserved. ND: not determined.

1. **Ciusa ML, Furi L, Knight D, Decorosi F, Fondi M, Raggi C, Coelho JR, Aragonés L, Moce L, Visa P, Freitas AT, Baldassarri L, Fani R, Viti C, Orefici G, Martínez JL, Morrissey I, Oggioni MR.** 2012. A novel resistance mechanism to triclosan that suggests horizontal gene transfer and demonstrates a potential selective pressure for reduced biocide susceptibility in clinical strains of *Staphylococcus aureus*. *Int J Antimicrob Agents* **40**:210-220.
2. **Nielsen LN, Larsen MH, Skovgaard S, Kastbjerg V, Westh H, Gram L, Ingmer H.** 2013. *Staphylococcus aureus* but not *Listeria monocytogenes* adapt to triclosan and adaptation correlates with increased *fabI* expression and *agr* deficiency. *BMC Microbiol* **13**:177.
3. **Fan F, Yan K, Wallis NG, Reed S, Moore TD, Rittenhouse SF, DeWolf WE, Jr., Huang J, McDevitt D, Miller WH, Seefeld MA, Newlander KA, Jakas DR, Head MS, Payne DJ.** 2002. Defining and combating the mechanisms of triclosan resistance in clinical isolates of *Staphylococcus aureus*. *Antimicrob Agents Chemother* **46**:3343-3347.
4. **Brenwald NP, Fraise AP.** 2003. Triclosan resistance in methicillin-resistant *Staphylococcus aureus* (MRSA). *J Hosp Infect* **55**:141-144.
5. **Skovgaard S, Nielsen LN, Larsen MH, Skov RL, Ingmer H, Westh H.** 2013. *Staphylococcus epidermidis* isolated in 1965 are more susceptible to triclosan than current isolates. *PLoS One* **8**:e62197.
